# Supplementary material for: Comparative Genomic Analysis of Sphingomonas morindae sp. NBD5 and Sphingopyxis sp. USTB-05 for Producing Macular Pigment
Source: Microorganisms. 2023 Jan 19;11(2):266. doi: 10.3390/microorganisms11020266 (PMC9967899; doi:10.3390/microorganisms11020266)
Supplement: Supplementary file 1 [file microorganisms-11-00266-s001.zip]

Archive with 4 entries (4 files):
- Figures S1-S5.pptx
- Figures S6-S8.pdf
- Table S1 Gene Ontology (GO) classifications of genes.xlsx
- Table S2 Clusters of Orthologous Group (COG) classifications of genes.xlsx
