# Supplementary material for: Comparative Genomic Analysis of Sphingomonas morindae sp. NBD5 and Sphingopyxis sp. USTB-05 for Producing Macular Pigment
Source: Microorganisms. 2023 Jan 19;11(2):266. doi: 10.3390/microorganisms11020266 (PMC9967899; doi:10.3390/microorganisms11020266)
Supplement: Supplementary file 1 [file microorganisms-11-00266-s001.zip › Table S1 Gene Ontology (GO) classifications of genes.xlsx]

## Sheet: Sheet1
Table S1 Gene classification results: Gene Ontology (GO) classifications of genes. It includes the hierarchy of GO and gene number in this GO term.
#GO ID (Lev2)	GO Term (Lev2)	GO Term (Lev1)	Gene Number
GO:0043226	organelle	Cellular Component	127
GO:0005623	cell	Cellular Component	1520
GO:0044464	cell part	Cellular Component	1514
GO:0044422	organelle part	Cellular Component	61
GO:0016020	membrane	Cellular Component	903
GO:0032991	protein-containing complex	Cellular Component	246
GO:0009295	nucleoid	Cellular Component	14
GO:0044217	other organism part	Cellular Component	8
GO:0044215	other organism	Cellular Component	8
GO:0044425	membrane part	Cellular Component	593
GO:0005576	extracellular region	Cellular Component	75
GO:0044421	extracellular region part	Cellular Component	4
GO:0031974	membrane-enclosed lumen	Cellular Component	1
GO:0003824	catalytic activity	Molecular Function	1623
GO:0005488	binding	Molecular Function	1500
GO:0005215	transporter activity	Molecular Function	275
GO:0140104	molecular carrier activity	Molecular Function	2
GO:0140110	transcription regulator activity	Molecular Function	164
GO:0016209	antioxidant activity	Molecular Function	28
GO:0060089	molecular transducer activity	Molecular Function	63
GO:0098772	molecular function regulator	Molecular Function	15
GO:0005198	structural molecule activity	Molecular Function	69
GO:0004871	obsolete signal transducer activity	Molecular Function	55
GO:0000990	obsolete transcription factor activity, core RNA polymerase binding	Molecular Function	1
GO:0051179	localization	Biological Process	470
GO:0008152	metabolic process	Biological Process	1752
GO:0050789	regulation of biological process	Biological Process	471
GO:0065007	biological regulation	Biological Process	559
GO:0048519	negative regulation of biological process	Biological Process	69
GO:0009987	cellular process	Biological Process	1631
GO:0048518	positive regulation of biological process	Biological Process	82
GO:0050896	response to stimulus	Biological Process	598
GO:0051704	multi-organism process	Biological Process	292
GO:0040011	locomotion	Biological Process	114
GO:0071840	cellular component organization or biogenesis	Biological Process	251
GO:0098754	detoxification	Biological Process	21
GO:0032502	developmental process	Biological Process	98
GO:0019740	nitrogen utilization	Biological Process	17
GO:0009758	carbohydrate utilization	Biological Process	11
GO:0048511	rhythmic process	Biological Process	7
GO:0002376	immune system process	Biological Process	5
GO:0001906	cell killing	Biological Process	11
GO:0023052	signaling	Biological Process	165
GO:0040007	growth	Biological Process	118
GO:0015976	carbon utilization	Biological Process	2
GO:0022610	biological adhesion	Biological Process	10
GO:0000003	reproduction	Biological Process	9
GO:0022414	reproductive process	Biological Process	8
