# Supplementary material for: Comparative Genomic Analysis of Sphingomonas morindae sp. NBD5 and Sphingopyxis sp. USTB-05 for Producing Macular Pigment
Source: Microorganisms. 2023 Jan 19;11(2):266. doi: 10.3390/microorganisms11020266 (PMC9967899; doi:10.3390/microorganisms11020266)
Supplement: Supplementary file 1 [file microorganisms-11-00266-s001.zip › Table S2 Clusters of Orthologous Group (COG) classifications of genes.xlsx]

## Sheet: Sheet1
Table S2 Gene classification results: Clusters of Orthologous Group (COG) classifications of genes. It shows the COG class, abbreviation, gene numbers and IDs in the COG term.
Class (Lev1)	Class (Lev2)	Abbreviation	Gene Numbers
Cellular Processes And Signaling	cell cycle control, cell division, chromosome partitioning	D	37
Cellular Processes And Signaling	cell wall/membrane/envelope biogenesis	M	259
Cellular Processes And Signaling	cell motility	N	111
Cellular Processes And Signaling	posttranslational modification, protein turnover, chaperones	O	135
Cellular Processes And Signaling	signal transduction mechanisms	T	222
Cellular Processes And Signaling	intracellular trafficking, secretion, and vesicular transport	U	107
Cellular Processes And Signaling	defense mechanisms	V	44
Cellular Processes And Signaling	cytoskeleton	Z	2
Information Storage And Processing	chromatin structure and dynamics	B	2
Information Storage And Processing	translation, ribosomal structure and biogenesis	J	176
Information Storage And Processing	transcription	K	281
Information Storage And Processing	replication, recombination and repair	L	175
Metabolism	energy production and conversion	C	197
Metabolism	amino acid transport and metabolism	E	247
Metabolism	nucleotide transport and metabolism	F	80
Metabolism	carbohydrate transport and metabolism	G	250
Metabolism	coenzyme transport and metabolism	H	140
Metabolism	lipid transport and metabolism	I	168
Metabolism	inorganic ion transport and metabolism	P	206
Metabolism	secondary metabolites biosynthesis, transport and catabolism	Q	102
Poorly Characterized	function unknown	S	727
